# Supplementary material for: Predicting Postoperative Complications in Cancer Patients: A Survey Bridging Classical and Machine Learning Contributions to Postsurgical Risk Analysis
Source: MDPI journal article supplement (doi:10.3390/cancers13133217), 2021-06-28
Supplement: s1 [file s1]

# Predicting Postoperative Complications in Cancer Patients: A Survey Bridging Classical and Machine Learning Contributions to Postsurgical Risk Analysis

Daniel M. Gonçalves, Rui Henriques, Rafael S. Costa

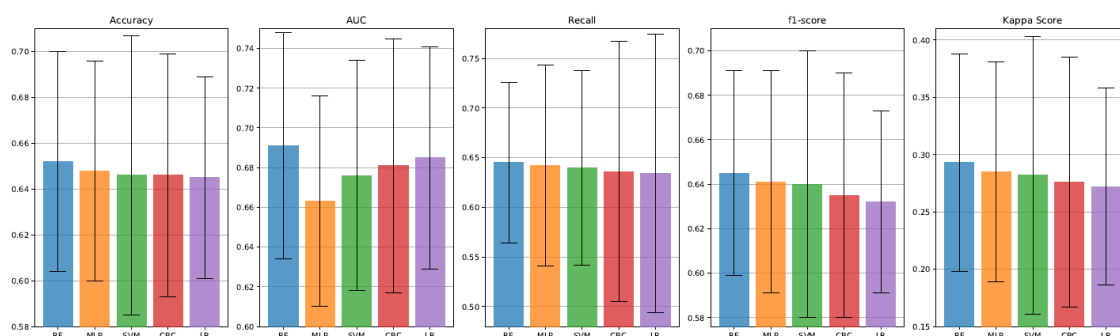

**Figure S1.** Best model results for postoperative complications prediction (RF=Random Forest; MLP=Multi-Layer Perceptron; SVM=Support Vector Machine; CBC=CatBoost Classifier; LR=Logistic Regression.)

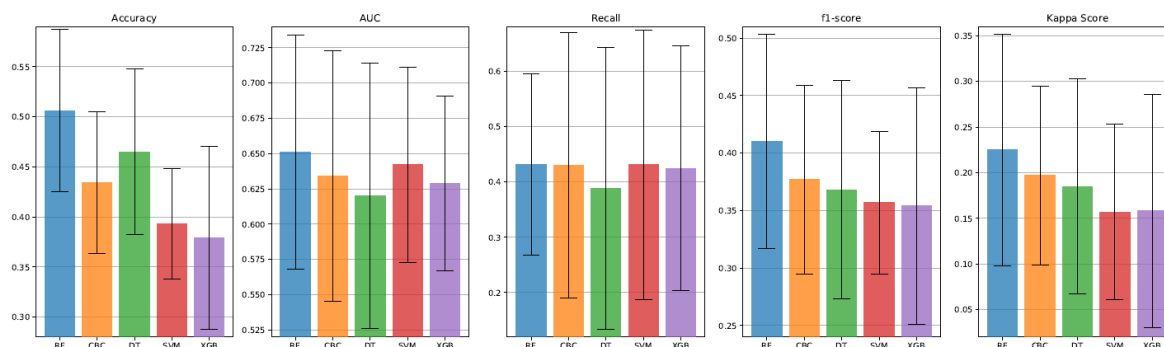

**Figure S2.** Best model results for complications' severity prediction (RF=Random Forest; CBC=CatBoost Classifier; DT=Decision Tree; SVM=Support Vector Machine; XGB=XGBoost.)

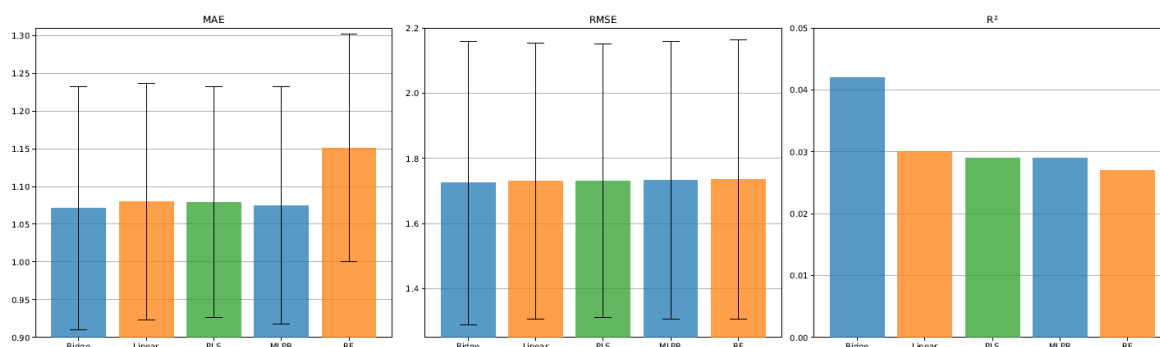

**Figure S3.** Best model results for ICU length of stay prediction (Ridge=Ridge Regression; Linear=Linear Regression; PLS=Partial Least Squares; MLPR=Multi-Layer Perceptron Regressor; RF=Random Forest.)

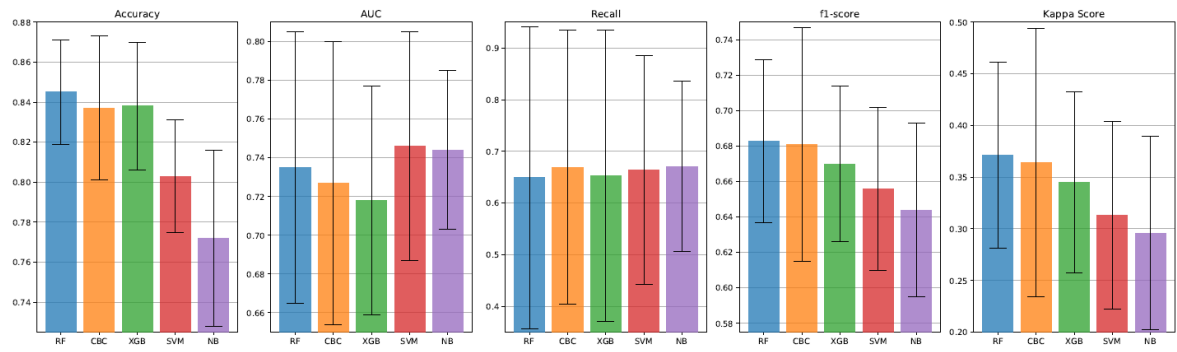

**Figure S4.** Best model results for 1-year death prediction (RF=Random Forest; CBC=CatBoost Classifier; XGB=XGBoost; SVM=Support Vector Machine; NB=Naive Bayes.)
